# Supplementary material for: Risk Guarantees for End-to-End Prediction and Optimization Processes
Source: Atypon-hosted journal article supplement (doi:10.1287/mnsc.2022.4321), 2022-03-11
Supplement: mnsc.2022.4321.sm1.pdf [file mnsc.2022.4321.sm1.pdf]

## Electronic Companion to *Risk Guarantees for End-to-End Prediction and Optimization Processes*

### EC.1. A Note on the Regularity of $X^*$ and $x^*$

We denote the power set, the collection of all subsets of  $X$ , as  $2^X$ . An important property that we exploit is that the argmin mapping  $X^*(d)$  is, in a sense, well-behaved as we change  $d$ . More precisely, the sense of regularity that we use is upper semicontinuity, which stems from a result in perturbation analysis ([Bonnans and Shapiro 2000](#)).

DEFINITION EC.1. A multivalued function  $F : \mathbb{R}^m \rightarrow 2^X$  is *upper semi-continuous* at a point  $d \in \mathbb{R}^m$  if, for any open set  $U$  containing  $F(d)$ , there exists an open set  $U_d$  containing  $d$  such that for all  $d' \in U_d$ ,  $F(d') \subseteq U$ . Equivalently,  $F$  is upper semi-continuous if, for any closed set  $V$ , the following set is closed:

$$\{d \in \mathbb{R}^m : F(d) \cap V \neq \emptyset\}.$$

LEMMA EC.1. *Suppose  $X$  is compact. Then the multivalued mapping  $X^* : \mathbb{R}^m \rightarrow 2^X$  is upper semi-continuous.*

*Proof.* This follows immediately from verifying the conditions of [Bonnans and Shapiro \(2000, Proposition 4.4\)](#), which are straightforward to check due to the fact that the domain  $X$  does not change with the vector  $d$ .  $\square$

We can use Lemma [EC.1](#) to show the existence of a measurable selection  $x^*(d) \in X^*(d)$  via an application of the Kuratowski–Ryll–Nardzewski theorem on the existence of measurable selectors for multivalued mappings. We use the version stated in [Bogachev \(2007, Theorem 6.9.3\)](#).

LEMMA EC.2. *Suppose  $X$  is compact. Then there exists a measurable mapping  $x^* : \mathbb{R}^m \rightarrow X$  such that  $x^*(d) \in X^*(d)$  for all  $d \in \mathbb{R}^m$ .*

*Proof.* Consider the multivalued function  $X^* : \mathbb{R}^m \rightarrow 2^X$  defined by  $X^*(d) = \arg \min_{x \in X} d^\top x$ . Note that since  $d^\top x$  is continuous,  $X^*(d) = \{x \in X : d^\top x = \min_{x' \in X} d^\top x'\}$  is closed (it is the inverse of a singleton). Now consider an open set  $U$ , and the sets

$$\hat{X}^*(U) := \{d \in \mathbb{R}^m : X^*(d) \cap U \neq \emptyset\}.$$

It is known that  $U$  can be represented as the countable union of closed sets:  $U = \bigcup_{k \in \mathbb{N}} V_k$  where  $V_k$  are closed. Thus, we can write

$$\hat{X}^*(U) = \{d \in \mathbb{R}^m : \exists k \in \mathbb{N} \text{ s.t. } X^*(d) \cap V_k \neq \emptyset\} = \bigcup_{k \in \mathbb{N}} \{d \in \mathbb{R}^m : X^*(d) \cap V_k \neq \emptyset\}.$$

Now, since  $X^*(d)$  is upper semicontinuous,  $\{d \in \mathbb{R}^m : X^*(d) \cap U_k \neq \emptyset\}$  is closed, hence  $\hat{X}^*(U)$  is a countable union of closed sets, hence measurable. This shows that  $X^*(\cdot)$  satisfies the conditions of [Bogachev \(2007, Theorem 6.9.3\)](#), therefore there exists a measurable selection  $x^*(d) \in X^*(d)$  for all  $d \in \mathbb{R}^m$ .  $\square$

Furthermore, we can show that *any* selection  $x^*$  is at least *Lebesgue* measurable, using the following result of [Drusvyatskiy and Lewis \(2011\)](#).

LEMMA EC.3 ([Drusvyatskiy and Lewis \(2011, Corollary 3.5\)](#)). *The set*

$$D := \{d \in \mathbb{R}^m : X^*(d) \text{ is not a singleton}\}$$

*has Lebesgue measure zero.*

LEMMA EC.4. *Any selection  $x^* : \mathbb{R}^m \rightarrow X$  such that  $x^*(d) \in X^*(d)$  for all  $d \in \mathbb{R}^m$  is Lebesgue measurable.*

*Proof.* Lemma [EC.2](#) tells us that there exists one such measurable selection  $\bar{x}^*$ . Consider another selection  $x^*$ . Then by Lemma [EC.3](#),  $\bar{x}^*$  and  $x^*$  differ on at most a set  $D$  with Lebesgue measure 0, which is Lebesgue measurable. Furthermore, all subsets of  $D$  are also Lebesgue measurable, so  $x^*$  must be Lebesgue measurable.  $\square$

In order for our expectations to be well-defined, we make the following assumption.

ASSUMPTION EC.1. *Any probability distribution  $\mathbb{P}$  is defined on the  $\sigma$ -algebra of Lebesgue measurable sets.*

This is not practically restrictive, since any probability distribution we encounter in practice can be written as a mixture of a distribution which is absolutely continuous with respect to Lebesgue measure (i.e., it has a density function), and a discrete distribution supported on a countable set. Such a probability distribution is Lebesgue measurable.

## EC.2. Proof of Results from Section 3

*Proof of Lemma 1.* The measurability of  $w \mapsto \mathbb{E}[c | w]$  is obvious by definition of the conditional expectation. Fix some measurable  $g : W \rightarrow \mathbb{R}^m$ . Observe that for  $w \in W$ ,

$$\begin{aligned} \mathbb{E}[L(g(w), c) | w] &= \mathbb{E} \left[ f(x^*(g(w))) + c^\top x^*(g(w)) - \min_{x \in X} \{f(x) + c^\top x\} \mid w \right] \\ &= \mathbb{E} [f(x^*(g(w))) \mid w] + \mathbb{E} [c | w]^\top x^*(g(w)) - \mathbb{E} \left[ \min_{x \in X} \{f(x) + c^\top x\} \mid w \right] \\ &= \mathbb{E} [f(x^*(g(w))) \mid w] + g^*(w)^\top x^*(g(w)) - \mathbb{E} \left[ \min_{x \in X} \{f(x) + c^\top x\} \mid w \right] \\ &\geq f(x^*(g^*(w))) + g^*(w)^\top x^*(g^*(w)) - \mathbb{E} \left[ \min_{x \in X} \{f(x) + c^\top x\} \mid w \right] \\ &= f(x^*(g^*(w))) + \mathbb{E} [c | w]^\top x^*(g^*(w)) - \mathbb{E} \left[ \min_{x \in X} \{f(x) + c^\top x\} \mid w \right] \end{aligned}$$

$$\begin{aligned}
 &= \mathbb{E} \left[ f(x^*(g^*(w))) + c^\top x^*(g^*(w)) - \min_{x \in X} \{f(x) + c^\top x\} \mid w \right] \\
 &= \mathbb{E}[L(g^*(w), c) \mid w],
 \end{aligned}$$

where the inequality follows from the definition of  $x^*(\cdot)$ . Integrating both sides of this relation over  $w \in W$  gives  $R(g, \mathbb{P}) \geq R(g^*, \mathbb{P})$ . Thus,  $g^*$  is the minimizer of  $R(g, \mathbb{P})$ .

The second result follows because

$$\begin{aligned}
 \min_{d' \in \mathbb{R}^m} \mathbb{E}[L(d', c) \mid w] &= \min_{d' \in \mathbb{R}^m} \{f(x^*(d')) + \mathbb{E}[c \mid w]^\top x^*(d')\} - \mathbb{E} \left[ \min_{x \in X} \{f(x) + c^\top x\} \mid w \right] \\
 &= \min_{d' \in \mathbb{R}^m} \{f(x^*(d')) + g^*(w)^\top x^*(d')\} - \mathbb{E} \left[ \min_{x \in X} \{f(x) + c^\top x\} \mid w \right] \\
 &= f(x^*(g^*(w))) + g^*(w)^\top x^*(g^*(w)) - \mathbb{E} \left[ \min_{x \in X} \{f(x) + c^\top x\} \mid w \right] \\
 &= f(x^*(g^*(w))) + \mathbb{E}[c \mid w]^\top x^*(g^*(w)) - \mathbb{E} \left[ \min_{x \in X} \{f(x) + c^\top x\} \mid w \right] \\
 &= \mathbb{E}[L(g^*(w), c) \mid w],
 \end{aligned}$$

and then integrating both sides over  $w \in W$  gives  $\mathbb{E}[\min_{d' \in \mathbb{R}^m} \mathbb{E}[L(d', c) \mid w]] = \mathbb{E}[L(g^*(w), c)] = R(\mathbb{P})$ .  $\square$

### EC.3. Proof of Theorem 1

Define

$$\delta_\ell(\epsilon, w; \mathbb{P}) := \inf_{d \in \mathbb{R}^m} \left\{ \mathbb{E}[\ell(d, c) \mid w] - \min_{d' \in \mathbb{R}^m} \mathbb{E}[\ell(d', c) \mid w] : \mathbb{E}[L(d, c) \mid w] - \min_{d' \in \mathbb{R}^m} \mathbb{E}[L(d', c) \mid w] \geq \epsilon \right\}. \tag{EC.1}$$

Note that if  $\ell$  is  $\mathbb{P}$ -calibrated, then  $\delta_\ell(\epsilon, w; \mathbb{P}) > 0$  for all  $\epsilon > 0, w \in W$  by taking the contrapositive of the implication in Definition 3. In order to prove Theorem 1, we first verify measurability for  $\delta_\ell$ .

**LEMMA EC.5.** *Suppose  $\ell$  is measurable and satisfies Assumption 1, and that  $X$  is compact. For any  $\epsilon > 0$ , the function  $\delta_\ell(\epsilon, \cdot; \mathbb{P}) : W \rightarrow \mathbb{R}$  is measurable.*

*Proof.* Consider the set

$$W_r := \{w \in W : \delta_\ell(\epsilon, w; \mathbb{P}) \leq r\}.$$

Showing measurability of  $\delta_\ell(\epsilon, \cdot; \mathbb{P})$  boils down to showing that  $W_r$  is measurable. Rewrite

$$\begin{aligned}
 W_r &= \left\{ w \in W : \forall k \in \mathbb{N}, \exists d \in \mathbb{R}^m \text{ s.t. } \begin{array}{l} \mathbb{E}[\ell(d, c) \mid w] - \min_{d' \in \mathbb{R}^m} \mathbb{E}[\ell(d', c) \mid w] \leq r + 1/k \\ \mathbb{E}[L(d, c) \mid w] - \min_{d' \in \mathbb{R}^m} \mathbb{E}[L(d', c) \mid w] \geq \epsilon \end{array} \right\} \\
 &= \bigcap_{k \in \mathbb{N}} \left\{ w \in W : \exists d \in \mathbb{R}^m \text{ s.t. } \begin{array}{l} \mathbb{E}[\ell(d, c) \mid w] - \min_{d' \in \mathbb{R}^m} \mathbb{E}[\ell(d', c) \mid w] \leq r + 1/k \\ \mathbb{E}[L(d, c) \mid w] - \min_{d' \in \mathbb{R}^m} \mathbb{E}[L(d', c) \mid w] \geq \epsilon \end{array} \right\}
 \end{aligned}$$

To this end, first consider the subset

$$\begin{aligned} W_L(\epsilon) &= \left\{ (w, d) \in W \times \mathbb{R}^m : \mathbb{E}[L(d, c) | w] - \min_{d' \in \mathbb{R}^m} \mathbb{E}[L(d', c) | w] \geq \epsilon \right\} \\ &= \left\{ (w, d) \in W \times \mathbb{R}^m : f(x^*(d)) + \mathbb{E}[c | w]^\top x^*(d) - \min_{x \in X} \{f(x) + \mathbb{E}[c | w]^\top x\} \geq \epsilon \right\}. \end{aligned}$$

This is measurable since  $\mathbb{E}[c | w]$  is measurable in  $w$  by definition of conditional expectation,  $f$  is continuous hence measurable, and we have assumed  $x^*(d)$  is measurable in  $d$ , which is possible by Lemma EC.2.

Now consider the subset

$$W_\ell(\alpha) = \left\{ (w, d) \in W \times \mathbb{R}^m : \mathbb{E}[\ell(d, c) | w] - \min_{d' \in \mathbb{R}^m} \mathbb{E}[\ell(d', c) | w] \leq \alpha \right\}.$$

First observe that the function  $h$  defined by  $h(w, d) = \mathbb{E}[\ell(d, c) | w]$  is continuous in  $d$  and measurable in  $w$ . Continuity in  $d$  follows because  $\ell(d, c)$  is convex in  $d$ , and  $h(w, d)$  is finite for any  $w$  by Assumption 1, and all convex functions are continuous in the relative interiors of their domains (see e.g., Rockafellar (1970, Theorem 10.1)). Measurability follows from measurability of  $\ell$  and the definition of conditional expectation.

We now show that  $h$  is jointly measurable in  $(w, d)$  by showing that it is a pointwise limit of measurable functions. For  $k \in \mathbb{N}$ , consider the box  $B_k := [-k, k]^m \subset \mathbb{R}^m$  and a finite set of grid points  $G_k \subset B_k$  such that any point  $d \in B_k$  is at most distance  $1/k$  away from a grid point in Euclidean norm. If  $d \in B_k$ , define  $h_k(w, d) = h(w, g)$  where  $g \in B_k$  is the closest grid point to  $d$  (with ties broken arbitrarily), and if  $d \notin B_k$  define  $h_k(w, d) = 0$ . Note that fixing  $g$ ,  $w \mapsto h_g(w) := h(w, g)$  is measurable in  $w$ . Now,  $h_k$  is the sum of finitely many functions of the form  $\mathbf{1}_D(d)h_g(w)$  for some measurable set  $D$  and grid point  $g$ . It is easy to check that this is measurable, therefore  $h_k$  is measurable. Furthermore, by continuity of  $h$  in  $d$ ,  $h_k(w, d) \rightarrow h(w, d)$  pointwise. Therefore,  $h$  is measurable. Finally, the function  $(w, d) \mapsto \min_{d' \in \mathbb{R}^m} h(w, d')$  is measurable because by continuity of  $h$  in  $d$ , we can write

$$\left\{ (w, d) : \min_{d' \in \mathbb{R}^m} h(w, d') \leq \alpha \right\} = \bigcup_{d' \in D_*, k \in \mathbb{N}} \{(w, d) : h(w, d') \leq \alpha + 1/k\}$$

where  $D_*$  is a countable dense subset of  $\mathbb{R}^m$  (e.g.,  $\mathbb{Q}^m$ ). This shows that  $W_\ell(\alpha)$  is measurable because the function  $h(w, d) - \min_{d' \in \mathbb{R}^m} h(w, d') = \mathbb{E}[\ell(d, c) | w] - \min_{d' \in \mathbb{R}^m} \mathbb{E}[\ell(d', c) | w]$  is measurable.

Now notice that the set

$$\left\{ (w, d) \in W \times \mathbb{R}^m : \begin{array}{l} \mathbb{E}[\ell(d, c) | w] - \min_{d' \in \mathbb{R}^m} \mathbb{E}[\ell(d', c) | w] \leq r + 1/k \\ \mathbb{E}[L(d, c) | w] - \min_{d' \in \mathbb{R}^m} \mathbb{E}[L(d', c) | w] \geq \epsilon \end{array} \right\} = W_\ell(r + 1/k) \cap W_L(\epsilon)$$

is measurable. Therefore, its projection onto  $W$  is measurable, which is

$$\left\{ w \in W : \exists d \in \mathbb{R}^m \text{ s.t. } \begin{aligned} & \mathbb{E}[\ell(d, c) | w] - \min_{d' \in \mathbb{R}^m} \mathbb{E}[\ell(d', c) | w] \leq r + 1/k \\ & \mathbb{E}[L(d, c) | w] - \min_{d' \in \mathbb{R}^m} \mathbb{E}[L(d', c) | w] \geq \epsilon \end{aligned} \right\}.$$

This shows that  $W_r$  is measurable, concluding our proof.  $\square$

*Proof of Theorem 1.* We wish to apply a result of [Steinwart \(2007, Theorem 2.8\)](#), for which we need to show that there exists measurable functions  $b: W \rightarrow \mathbb{R}$  and  $\delta: (0, \infty) \times W \rightarrow (0, \infty)$  such that  $\mathbb{E}[|b(w)|] < \infty$ , for any  $w \in W$

$$\mathbb{E}[L(d, c) | w] - \min_{d' \in \mathbb{R}^m} \mathbb{E}[L(d', c) | w] \leq b(w),$$

and for any  $\epsilon > 0$  and predictor  $g: W \rightarrow \mathbb{R}^m$ ,

$$\begin{aligned} & \left\{ w \in W : \mathbb{E}[\ell(g(w), c) | w] - \min_{d' \in \mathbb{R}^m} \mathbb{E}[\ell(d', c) | w] < \delta(\epsilon, w) \right\} \\ & \subseteq \left\{ w \in W : \mathbb{E}[L(g(w), c) | w] - \min_{d' \in \mathbb{R}^m} \mathbb{E}[L(d', c) | w] < \epsilon \right\}. \end{aligned}$$

We first find  $b$ . Let  $\Omega$  be the  $\ell_\infty$ -diameter of the set  $X$ , which is finite since  $X$  is compact. Observe that for any  $d \in \mathbb{R}^m$ ,

$$\begin{aligned} \mathbb{E}[L(d, c) | w] - \min_{d' \in \mathbb{R}^m} \mathbb{E}[L(d', c) | w] &= f(x^*(d)) + \mathbb{E}[c | w]^\top x^*(d) - \min_{x \in X} \{f(x) + \mathbb{E}[c | w]^\top x\} \\ &\leq \max_{x, x' \in X} \{f(x) - f(x') + \mathbb{E}[c | w]^\top (x' - x)\} \\ &\leq \max_{x, x' \in X} \{f(x) - f(x') + \|\mathbb{E}[c | w]\|_1 \|x' - x\|_\infty\} \\ &\leq \Omega \|\mathbb{E}[c | w]\|_1 + \max_{x, x' \in X} \{f(x) - f(x')\}. \end{aligned}$$

Therefore, we can define  $b(w) := \Omega \|\mathbb{E}[c | w]\|_1 + \max_{x, x' \in X} \{f(x) - f(x')\}$  for each  $w \in W$ , which is integrable as  $\mathbb{E}[\|\mathbb{E}[c | w]\|_1] \leq \mathbb{E}[\|c\|_1] = \mathbb{E}[|c|] < \infty$  by Assumption 1.

We will take  $\delta := \delta_\ell(\cdot; \mathbb{P})$  defined in [\(EC.1\)](#), which is measurable by Lemma [EC.5](#). For any  $g: W \rightarrow \mathbb{R}^m$ , and  $w \in W$  such that  $\mathbb{E}[L(g(w), c) | w] - \min_{d' \in \mathbb{R}^m} \mathbb{E}[L(d', c) | w] \geq \epsilon$ , by  $\mathbb{P}$ -calibration and definition of  $\delta_\ell$  we have  $\mathbb{E}[\ell(g(w), c) | w] - \min_{d' \in \mathbb{R}^m} \mathbb{E}[\ell(d', c) | w] \geq \delta_\ell(\epsilon, w; \mathbb{P})$ , therefore the required property for  $\delta$  is satisfied.

Applying the result of [Steinwart \(2007, Theorem 2.8\)](#) then gives the risk bound.  $\square$

#### EC.4. Proofs of Results from Section 4

*Proof of Theorem 2.* Denote

$$\begin{aligned} D_\ell(\alpha; w) &:= \left\{ d \in \mathbb{R}^m : \mathbb{E}[\ell(d, c) | w] - \min_{d' \in \mathbb{R}^m} \mathbb{E}[\ell(d', c) | w] < \alpha \right\} \\ D(\alpha; w) &:= \left\{ d \in \mathbb{R}^m : \mathbb{E}[L(d, c) | w] - \min_{d' \in \mathbb{R}^m} \mathbb{E}[L(d', c) | w] < \alpha \right\}. \end{aligned}$$

Note that

$$\arg \min_{d' \in \mathbb{R}^m} \mathbb{E}[\ell(d', c) | w] = \bigcap_{\alpha > 0} D_\ell(\alpha; w), \quad \arg \min_{d' \in \mathbb{R}^m} \mathbb{E}[L(d', c) | w] = \bigcap_{\alpha > 0} D(\alpha; w).$$

Suppose first that  $\ell$  is  $\mathbb{P}$ -calibrated. Then for any  $\epsilon > 0$ , there exists  $\delta > 0$  (which can depend on  $w$ ) such that  $D_\ell(\delta; w) \subseteq D(\epsilon; w)$ . In particular, since  $D_\ell(\alpha; w) \subseteq D_\ell(\alpha'; w)$  for  $\alpha \leq \alpha'$ , we have

$$\arg \min_{d' \in \mathbb{R}^m} \mathbb{E}[\ell(d', c) | w] = \bigcap_{0 < \alpha \leq \delta} D_\ell(\alpha; w) \subseteq D(\epsilon; w).$$

Taking the intersection of the right hand side over  $\epsilon > 0$ , we have

$$\arg \min_{d' \in \mathbb{R}^m} \mathbb{E}[\ell(d', c) | w] \subseteq \arg \min_{d' \in \mathbb{R}^m} \mathbb{E}[L(d', c) | w],$$

hence  $\ell$  is  $\mathbb{P}$ -Fisher consistent.

Suppose now that  $\ell$  is not  $\mathbb{P}$ -calibrated. We show that it is also not  $\mathbb{P}$ -Fisher consistent. Fix an arbitrary  $w \in W$ . Note that the function  $h : \mathbb{R}^m \rightarrow \mathbb{R}$  defined by  $h(d) = \mathbb{E}[\ell(d, c) | w]$  is convex by convexity of  $\ell(d, c)$ , and hence under Assumption 1, it is continuous (see e.g., [Rockafellar \(1970, Theorem 10.1\)](#)).

Since  $\ell$  is not  $\mathbb{P}$ -calibrated, there exists  $w \in W$  and  $\epsilon > 0$  such that for all  $\delta > 0$ , there exists  $d(\delta) \in \mathbb{R}^m$  such that  $h(d(\delta)) - \min_{d' \in \mathbb{R}^m} h(d') < \delta$  but  $\mathbb{E}[L(d(\delta), c) | w] - \min_{d' \in \mathbb{R}^m} \mathbb{E}[L(d', c) | w] \geq \epsilon$ .

Now, let  $d_k = d(1/k)$  for  $k \in \mathbb{N}$ . Note that  $\{d_k\}_{k \in \mathbb{N}} \subset D_\ell(1; w)$  which is compact since by Assumption 1  $\arg \min_{d' \in \mathbb{R}^m} h(d')$  is compact, so all level sets are bounded (see, e.g., [Rockafellar \(1970, Corollary 8.7.1\)](#)). Therefore, there exists a convergent subsequence  $d'_k \rightarrow d \in \text{cl } D_\ell(1; w)$ . Since  $h$  is continuous, we must have  $d \in \arg \min_{d' \in \mathbb{R}^m} h(d')$ .

We now want to show that  $d \notin \arg \min_{d' \in \mathbb{R}^m} \mathbb{E}[L(d', c) | w]$ . We know from Lemma EC.1 that the argmin mapping  $X^*(\cdot)$  is upper semi-continuous at  $d$ . Suppose for contradiction that  $d \in \arg \min_{d' \in \mathbb{R}^m} \mathbb{E}[L(d', c) | w]$ . Then we must have  $X^*(d) \subseteq X^*(\mathbb{E}[c | w])$ . Thus, for  $\epsilon > 0$  the set

$$X^\circ(\epsilon') = \left\{ x' : f(x') + \mathbb{E}[c | w]^\top x' < \min_{x \in X} \{ f(x) + \mathbb{E}[c | w]^\top x \} + \epsilon' \right\}$$

is an “open” set (as  $x \mapsto f(x) + \mathbb{E}[c | w]^\top x$  is continuous) containing  $X^*(d)$ . Note that this is not open in  $\mathbb{R}^m$  by the usual topology, since  $f(x)$  may be infinite for  $x \notin X$ . However, it is open when we work with  $X \subset \mathbb{R}^m$  as the entire topological space with the induced topology from  $\mathbb{R}^m$ . Then, by Definition EC.1 of upper semi-continuity, there exists a neighbourhood  $D^\circ(\epsilon')$  of  $d$  such that for any  $d^\circ \in D^\circ(\epsilon')$ ,  $X^*(d^\circ) \subset X^\circ(\epsilon')$ , which means that  $\mathbb{E}[L(d^\circ, c) | w] < \min_{d' \in \mathbb{R}^m} \mathbb{E}[L(d', c) | w] + \epsilon'$  since  $x^*(d^\circ) \in X^*(d^\circ) \subseteq X^\circ(\epsilon')$ .

But now consider  $\epsilon' < \epsilon$ . Since  $d'_k \rightarrow d$ ,  $D^\circ(\epsilon')$  is open, and  $d \in D^\circ(\epsilon')$ , we eventually have  $d'_k \in D^\circ(\epsilon')$  for sufficiently large  $k$ . But this contradicts the fact that by construction of the sequence  $\{d_k\}_{k \in \mathbb{N}}$  we have  $\epsilon' < \epsilon < \mathbb{E}[L(d'_k, c) | w] - \min_{d' \in \mathbb{R}^m} \mathbb{E}[L(d', c) | w] = \mathbb{E}[c | w]^\top x^*(d'_k) - \min_{x \in X} \mathbb{E}[c | w]^\top x$ .  $\square$

*Proof of Corollary 2.* Fix some  $\epsilon > 0$ . Take  $\delta > 0$  corresponding to  $\epsilon$  in Corollary 1. Since  $R_\ell(g_n, \mathbb{P}) \rightarrow R_\ell(\mathbb{P})$ , we have  $R_\ell(g_n, \mathbb{P}) \leq R_\ell(\mathbb{P}) + \delta$  eventually. By Theorem 1, we will also have  $R(g_n, \mathbb{P}) \rightarrow R(\mathbb{P}) + \epsilon$  eventually.  $\square$

*Proof of Example 10.* Let us explore what  $\arg \min_{d' \in \mathbb{R}} \mathbb{E}[\ell(d, c) \mid w]$  is for our setting. For convenience, we fix  $w \in W$ , and omit the  $w$  in the notation, so that  $D^* = D_w^*$ ,  $\mathbb{E}[\cdot] = \mathbb{E}[\cdot \mid w]$  and  $\mathbb{P}[\cdot] = \mathbb{P}[\cdot \mid w]$ . Then

$$2\mathbb{E}[\ell(d, c)] = \mathbb{E}[|2d - c|] - 2d\mathbb{E}[\text{sign}(c)] + \mathbb{E}[|c|] = \mathbb{E}[|2d - c|] + 2d(\mathbb{P}[c < 0] - \mathbb{P}[c > 0]) + \mathbb{E}[|c|].$$

This is a convex function in  $d$ , so we look at the subdifferential to determine its minimizers. Note that

$$\partial_d \mathbb{E}[|2d - c|] = \{2(\mathbb{P}[c < 2d] - \mathbb{P}[c > 2d]) + s\mathbb{P}[c = 2d] : s \in [-1, 1]\},$$

so

$$\partial_d \mathbb{E}[\ell(d, c)] = \{\mathbb{P}[c < 2d] - \mathbb{P}[c > 2d] + \mathbb{P}[c < 0] - \mathbb{P}[c > 0] + s\mathbb{P}[c = 2d] : s \in [-1, 1]\}.$$

For simplicity, let us assume that  $\mathbb{P}[c = 2d] = 0$  for any  $d$  (many such distributions exist). Then  $\mathbb{E}[\ell(d, c)]$  is differentiable with

$$\nabla_d \mathbb{E}[\ell(d, c)] = \mathbb{P}[c < 2d] - \mathbb{P}[c > 2d] + \mathbb{P}[c < 0] - \mathbb{P}[c > 0].$$

Denote  $d^*$  to be a minimizer of  $\mathbb{E}[\ell(d, c)]$ . If  $\mathbb{P}[c < 0] = \mathbb{P}[c > 0]$ , then setting  $d = 0$  gives  $\nabla_d \mathbb{E}[\ell(d, c)] = 0$ , so  $d^* = c = 0$ . If  $\mathbb{P}[c < 0] - \mathbb{P}[c > 0] < 0$ , then  $\nabla_d \mathbb{E}[\ell(d, c)]|_{d=0} < 0$ , so increasing  $d$  from 0 will decrease  $\mathbb{E}[\ell(d, c)]$ . Thus,  $d^* > 0$ . However, note that  $\mathbb{P}[c < 0] - \mathbb{P}[c > 0] < 0$  implies that the median of  $c$  is also  $> 0$ . If  $\mathbb{P}[c < 0] - \mathbb{P}[c > 0] > 0$ , then  $\nabla_d \mathbb{E}[\ell(d, c)]|_{d=0} > 0$ , so decreasing  $d$  from 0 will decrease  $\mathbb{E}[\ell(d, c)]$ . Thus,  $d^* < 0$ . However, note that  $\mathbb{P}[c < 0] - \mathbb{P}[c > 0] > 0$  implies that the median of  $c$  is also  $< 0$ . In all cases, the minimizer  $d^*$  is of the same sign as the median of  $c$ . Now, if  $\mathbb{P}$  is a symmetric distribution, then the mean  $\mathbb{E}[c]$  is equal to the median, and thus  $d^*$  has the same sign as  $\mathbb{E}[c]$ , so also minimizes  $\mathbb{E}[L(d, c)]$ . However, if the median has a different sign to the mean, then  $\ell$  is not  $\mathbb{P}$ -Fisher consistent. Such distributions can be constructed by shifting a log-normal distribution, for example.  $\square$

*Proof of Example 11.* With the distribution  $\mathbb{P}$  specified,  $\min_{d' \in \mathbb{R}^m} \mathbb{E}[\ell_{\text{SPO}+}(d', c)]$  can be expressed as the following linear program (making the change of variables  $2d' \rightarrow d$ ):

$$\begin{aligned} \min_{d, \gamma} \quad & \sum_{j \in [m]} p_j (d_j - \gamma_j) \\ \text{s.t.} \quad & \gamma_j \leq d_j, \quad j \in [m] \\ & \gamma_j \leq d_k - 1, \quad j, k \in [m], k \neq j \\ & d, \gamma \in \mathbb{R}^m. \end{aligned}$$

We analyse this linear program. Fix a vector  $d \in \mathbb{R}^m$ . Let  $j^* \in \arg \min_{j' \in [m]} d_{j'}$ . Then since  $p_k > 0$  for all  $k \neq j^*$ , the optimal choice of  $\gamma_k$  makes it as large as possible, so we set  $\gamma_k = d_{j^*} - 1$  for  $k \neq j^*$ . In other words, for all but one index  $j^* \in \arg \min_{j' \in [m]} d_{j'}$ , we set  $\gamma_j = \min_{j' \in [m]} d_{j'} - 1$ . For  $j^*$ , we set  $\gamma_{j^*} = \min \{d_{j^*}, \min_{j' \neq j^*} d_{j'} - 1\}$ .

If there exists  $j \neq j^*$  such that  $d_{j^*} \leq d_j - 1$ , then decreasing  $d_j \downarrow d_{j^*} + 1$  does not violate any constraints since  $\gamma_j = d_{j^*} - 1 < d_j$  and  $\gamma_{j^*} = d_{j^*} \leq d_j - 1$ , and decreases the objective. Therefore, without loss of generality, we assume that  $d_j - 1 \leq d_{j^*}$  for all  $j \neq j^*$ . This implies that  $\gamma_{j^*} = \min_{j' \neq j^*} d_{j'} - 1$ .

Furthermore, if we have  $j, k \in [m] \setminus \{j^*\}$ ,  $j \neq k$  such that  $d_j < d_k$ , note that we can decrease  $d_k \downarrow d_j$  without violating any constraints, since  $\gamma_{j'} = d_{j^*} - 1 \leq d_j - 1 < d_k - 1 < d_k$  for all  $j' \neq j^*$  and  $\gamma_{j^*} \leq d_j - 1 < d_k - 1$ . This implies that, without loss of generality, we can assume that for  $j \neq j^*$ , we have  $d_j = \delta$  for some  $\delta \in [d_{j^*}, d_{j^*} + 1]$ . In particular, this implies that  $\gamma_{j^*} = \delta - 1$ , thus the objective becomes

$$\sum_{j \in [m]} p_j (d_j - \gamma_j) = (\delta - d_{j^*} + 1) \sum_{j \neq j^*} p_j + p_{j^*} (d_{j^*} - \delta + 1) = (1 - 2p_{j^*}) (\delta - d_{j^*}) + 1.$$

This shows that if  $p_{j^*} > 1/2$ , then we should make  $\delta$  as large as possible, i.e.,  $\delta = d_{j^*} + 1$ . On the other hand, when  $p_{j^*} < 1/2$ , we set  $\delta = d_{j^*}$ , i.e., the optimal vector  $d^*$  is constant.

This implies that, if there exists  $j^* \in [m]$  such that  $p_{j^*} > 1/2$ , and necessarily  $j^* = \arg \max_{j' \in [m]} p_{j'}$ , then the minimizers of  $\mathbb{E}[\ell(d, c)]$  take the form  $d_\alpha = (\alpha \mathbf{1}_m - e_{j^*})/2$  for  $\alpha \in \mathbb{R}$ . Clearly,  $\arg \min_{j' \in [m]} d_{\alpha, j'} = j^*$ , so for such distributions  $\mathbb{P}$ ,  $\ell_{\text{SPO}^+}$  is  $\mathbb{P}$ -Fisher consistent.

On the other hand, for distributions  $\mathbb{P}$  with  $\max_{j' \in [m]} p_{j'} < 1/2$ ,  $\ell_{\text{SPO}^+}$  is not  $\mathbb{P}$ -Fisher consistent, since the set of minimizers of  $\mathbb{E}[\ell(d, c)]$  are the vectors  $d_\alpha = \alpha \mathbf{1}_m$ ,  $\alpha \in \mathbb{R}$ , which cannot in general pick out the maximum probability class  $j \in [m]$ , i.e., the highest  $p_j$ .  $\square$

## EC.5. Proofs of Results from Section 5

*Proof of Lemma 2.* The “only if” direction was established in Remark 6, so we only need to prove the “if” direction.

When  $\delta_\ell(\epsilon; \mathcal{P}) > 0$ , take  $0 < \delta \leq \delta_\ell(\epsilon; \mathcal{P})$ , and noting that  $\delta_\ell(\cdot; \mathcal{P})$  is non-decreasing, we get for any  $d \in \mathbb{R}^m$ ,  $w \in W$  and  $\mathbb{P} \in \mathcal{P}$ ,

$$\mathbb{E}[\ell(d, c) | w] - \min_{d' \in \mathbb{R}^m} \mathbb{E}[\ell(d', c) | w] \leq \delta < \delta_\ell(\epsilon; \mathcal{P}).$$

If  $d \in \mathbb{R}^m$ ,  $w \in W$  and  $\mathbb{P} \in \mathcal{P}$  were such that  $\mathbb{E}[L(d, c) | w] - \min_{d' \in \mathbb{R}^m} \mathbb{E}[L(d', c) | w] > \epsilon$ , we reach a contradiction since we would then by definition of  $\delta_\ell(\cdot; \mathcal{P})$  in (14) have  $\mathbb{E}[\ell(d, c) | w] - \min_{d' \in \mathbb{R}^m} \mathbb{E}[\ell(d', c) | w] \geq \delta_\ell(\epsilon; \mathcal{P})$ . Thus, for any  $w \in W$  and  $\mathbb{P} \in \mathcal{P}$ ,

$$\mathbb{E}[\ell(d, c) | w] - \min_{d' \in \mathbb{R}^m} \mathbb{E}[\ell(d', c) | w] \leq \delta \implies \mathbb{E}[L(d, c) | w] - \min_{d' \in \mathbb{R}^m} \mathbb{E}[L(d', c) | w] \leq \epsilon.$$

$\square$

*Proof of Theorem 3.* When  $\ell$  is  $\mathcal{P}$ -uniformly calibrated, we know that  $\delta_\ell(\epsilon; \mathcal{P}) > 0$  for any  $\epsilon > 0$ . Steinwart (2007, Lemma A.6) shows that this implies  $\delta^{**}(\epsilon; \mathcal{P}) > 0$  for  $\epsilon \in (0, B_f + B_C B_X]$ .

We can now utilize Steinwart (2007, Theorem 2.13) to derive the risk bound. In order to do so, note that Steinwart (2007, Theorem 2.13) requires us to verify that for any  $g : W \rightarrow \mathbb{R}$ ,

$$\operatorname{ess\,sup}_{w \in W} \mathbb{E}[L(g(w), c) | w] - \min_{d' \in \mathbb{R}^m} \mathbb{E}[L(d', c) | w] \leq B_f + B_C B_X,$$

where  $\operatorname{ess\,sup}$  stands for essential supremum. The relation above follows from Remark 5 and from the definition of  $\delta_\ell(\cdot; \mathcal{P})$  that ensures that for any  $\epsilon > 0$  and  $w \in W$ , we have

$$\left\{ g : \mathbb{E}[\ell(g(w), c) | w] - \min_{d' \in \mathbb{R}^m} \mathbb{E}[\ell(d', c) | w] < \delta_\ell(\epsilon; \mathcal{P}) \right\} \subseteq \left\{ g : \mathbb{E}[L(g(w), c) | w] - \min_{d' \in \mathbb{R}^m} \mathbb{E}[L(d', c) | w] < \epsilon \right\}.$$

□

*Proof of Lemma 3.* Fix an arbitrary  $w \in W$ . Note that  $\mathbb{E}[c | w] \in \{c' : x^*(c') \in X^*(\mathbb{E}[c | w])\} = \arg \min_{d' \in \mathbb{R}^m} \mathbb{E}[L(d', c) | w]$ , hence we have

$$\begin{aligned} \mathbb{E}[L(d, c) | w] - \min_{d' \in \mathbb{R}^m} \mathbb{E}[L(d', c) | w] &= f(x^*(d)) + \mathbb{E}[c | w]^\top x^*(d) - \min_{d' \in \mathbb{R}^m} \{f(x^*(d')) + \mathbb{E}[c | w]^\top x^*(d')\} \\ &= f(x^*(d)) - f(x^*(\mathbb{E}[c | w])) + \mathbb{E}[c | w]^\top (x^*(d) - x^*(\mathbb{E}[c | w])). \end{aligned}$$

Hence

$$\begin{aligned} \delta_\ell(\epsilon; \mathcal{P}) &= \inf_{\substack{d \in \mathbb{R}^m \\ w \in W \\ \mathbb{P} \in \mathcal{P}}} \left\{ \mathbb{E}[\ell(d, c) | w] - \min_{d' \in \mathbb{R}^m} \mathbb{E}[\ell(d', c) | w] : \mathbb{E}[L(d, c) | w] - \min_{d' \in \mathbb{R}^m} \mathbb{E}[L(d', c) | w] \geq \epsilon \right\} \\ &= \inf_{d, \bar{c} \in \mathbb{R}^m} \inf_{\substack{w \in W \\ \mathbb{P} \in \mathcal{P} \\ \mathbb{E}[c | w] = \bar{c}}} \left\{ \mathbb{E}[\ell(d, c) | w] - \min_{d' \in \mathbb{R}^m} \mathbb{E}[\ell(d', c) | w] : f(x^*(d)) - f(x^*(\bar{c})) + \bar{c}^\top (x^*(d) - x^*(\bar{c})) \geq \epsilon \right\} \\ &= \inf_{x, x' \in X} \inf_{\substack{d : x^*(d) = x \\ \bar{c} : x^*(\bar{c}) = x'}} \inf_{\mathbb{P} : \mathbb{E}[c] = \bar{c}} \left\{ \mathbb{E}[\ell(d, c)] - \min_{d' \in \mathbb{R}^m} \mathbb{E}[\ell(d', c)] : f(x) - f(x') + \bar{c}^\top (x - x') \geq \epsilon \right\}. \end{aligned}$$

□

*Proof of Lemma 4.* Fix arbitrary distinct  $x, x' \in X$ . Consider the halfspace

$$H_0(x, x') = \{d' : f(x) - f(x') + (d')^\top (x - x') \leq 0\} \supseteq \{d' : x^*(d') = x\}.$$

Since  $x^*(d) = x$ , we have  $d \in H_0(x, x')$ . Now, if  $\bar{c} \in H_0(x, x')$ , then  $f(x) - f(x') + \bar{c}^\top (x - x') \leq 0$ , hence  $\|d - \bar{c}\|_2 \geq 0$ .

On the other hand, if  $x^*(\bar{c}) = x'$  and  $f(x) - f(x') + \bar{c}^\top (x - x') > 0$ , then we have  $\bar{c} \notin H_0(x, x')$ , hence the distance between  $\bar{c}$  and  $d$  is bounded below by the distance between  $\bar{c}$  and the halfspace  $H_0(x, x')$ , which has the expression

$$\|d - \bar{c}\|_2 \geq \inf_{d' \in H_0(x, x')} \|d' - \bar{c}\|_2 = \frac{f(x) - f(x') + \bar{c}^\top (x - x')}{\|x - x'\|_2}.$$

□

*Proof of Lemma 5.* The usual bias-variance decomposition for squared error gives us

$$\begin{aligned}\mathbb{E}[\ell_{\text{LS}}(d, c) \mid w] &= \mathbb{E}[\|d - c\|_2^2 \mid w] \\ &= \|d - \mathbb{E}[c \mid w]\|_2^2 + 2\mathbb{E}[(d - \mathbb{E}[c \mid w])^\top (\mathbb{E}[c \mid w] - c)] + \mathbb{E}[\|\mathbb{E}[c \mid w] - c\|_2^2] \\ &= \|d - \mathbb{E}[c \mid w]\|_2^2 + \mathbb{E}[\|\mathbb{E}[c \mid w] - c\|_2^2].\end{aligned}$$

Hence, we can minimize this by choosing  $d = \mathbb{E}[c \mid w]$ , and

$$\min_{d' \in \mathbb{R}^m} \mathbb{E}[\ell_{\text{LS}}(d', c) \mid w] = \mathbb{E}[\|\mathbb{E}[c \mid w] - c\|_2^2].$$

Therefore,

$$\mathbb{E}[\ell_{\text{LS}}(d, c) \mid w] - \min_{d' \in \mathbb{R}^m} \mathbb{E}[\ell_{\text{LS}}(d', c) \mid w] = \|d - \mathbb{E}[c \mid w]\|_2^2.$$

Substituting this into (15) and using the fact that the definition of  $\mathcal{P}$  tells us that  $\bar{c} = \mathbb{E}[c \mid w]$  can take on any point in  $\text{Conv}(C)$  gives the result.  $\square$

*Proof of Theorem 4.* Fixing distinct  $x, x' \in X$ , notice that if  $\bar{c}, d$  are chosen according to the conditions of Lemma 4, together with the condition that  $f(x) - f(x') + \bar{c}^\top (x - x') > \epsilon$ , then  $\|d - \bar{c}\|_2 > \epsilon/\|x - x'\|_2 \geq \epsilon/B_X > 0$ . Together with Lemma 5, we have, for all  $\epsilon > 0$ ,

$$\delta_{\ell_{\text{LS}}}(\epsilon; \mathcal{P}) \geq \frac{\epsilon^2}{B_X^2} > 0.$$

Then  $\mathcal{P}$ -uniform calibration follows from Lemma 2.  $\square$

*Proof of Corollary 3.* The result follows by observing that  $\epsilon^2/B_X^2 \leq \delta^{**}(\epsilon)$  since  $\epsilon \mapsto \epsilon^2/B_X^2$  is already convex, and then applying Theorem 3.  $\square$

*Proof of Theorem 5.* Analogous to (14), define

$$\delta_j(\epsilon; \mathcal{P}_{\text{sym}}) := \inf_{\substack{d_j \in \mathbb{R} \\ w \in W \\ \mathbb{P} \in \mathcal{P}_{\text{sym}}}} \left\{ \mathbb{E}[\ell_j(d_j, c_j) \mid w] - \min_{d'_j \in \mathbb{R}} \mathbb{E}[\ell_j(d'_j, c_j) \mid w] : (d_j - \mathbb{E}[c_j \mid w])^2 > \epsilon \right\}.$$

We first show that  $\delta_j(\epsilon; \mathcal{P}_{\text{sym}}) > 0$  for all  $\epsilon > 0$ .

First, fix  $\mathbb{P} \in \mathcal{P}_{\text{sym}}$  and  $w \in W$ , and observe that for any  $d_j$

$$\begin{aligned}\mathbb{E}[\ell_j(\mathbb{E}[c_j \mid w] + d_j, c_j) \mid w] &= \mathbb{E}[\psi_j(d_j - (c_j - \mathbb{E}[c_j \mid w])) \mid w] = \mathbb{E}[\psi_j(d_j - (\mathbb{E}[c_j \mid w] - c_j)) \mid w] \\ &= \mathbb{E}[\psi_j(-d_j + \mathbb{E}[c_j \mid w] - c_j) \mid w] \\ &= \mathbb{E}[\ell_j(\mathbb{E}[c_j \mid w] - d_j, c_j) \mid w].\end{aligned}$$

Since  $\psi$  is strictly convex,  $\mathbb{E}[\ell_j(d_j, c_j) \mid w]$  is strictly convex in  $d_j$ , thus for any  $d_j \neq 0$ ,

$$\begin{aligned}&\mathbb{E}[\ell_j(\mathbb{E}[c_j \mid w] + d_j, c_j) \mid w] - \mathbb{E}[\ell_j(\mathbb{E}[c_j \mid w], c_j) \mid w] \\ &= \frac{1}{2}\mathbb{E}[\ell_j(\mathbb{E}[c_j \mid w] + d_j, c_j) \mid w] + \frac{1}{2}\mathbb{E}[\ell_j(\mathbb{E}[c_j \mid w] - d_j, c_j) \mid w] - \mathbb{E}[\ell_j(\mathbb{E}[c_j \mid w], c_j) \mid w] \\ &\geq \frac{1}{4}\mathbb{E}[\delta_j(4d_j^2) \mid w] = \frac{1}{4}\delta_j(4d_j^2).\end{aligned}$$

This shows that  $\delta_j(\epsilon; \mathcal{P}_{\text{sym}}) \geq \delta_j(2\epsilon)/4$ . Now, following the outline in Section 5.1 and proceeding similarly to the proof of Theorem 3, we deduce the risk bound.  $\square$

*Proof of Proposition 1.* The proof is by construction. We will fix the mean of our class to be  $\epsilon$ . Let  $\phi$  be the density function of the standard normal distribution, and  $\Phi$  be the distribution function (note that  $\phi(c - \epsilon)$  is the density function of a  $N(\epsilon, 1)$  random variable. Let  $z_\epsilon = \Phi(-\epsilon) + 1 - \Phi(\epsilon)$  denote the probability that a standard normal variable is  $< -\epsilon$  or  $> \epsilon$ . Furthermore, let  $\{h(\cdot; \alpha)\}_{\alpha \in (0, 1)}$  be a class of continuous functions such that for each  $\alpha \in (0, 2/3)$ ,  $h(r; \alpha) > 0$  for  $r \in [0, 1]$ ,  $h(1; \alpha) = 1$ ,  $\int_{r=0}^1 h(r; \alpha) dr = \alpha$ . Such a class can be defined as follows:

$$h(r; \alpha) = \begin{cases} \alpha/2, & 0 \leq r \leq (2 - 3\alpha)/(2 - \alpha) \\ (2 - \alpha)^2(r - 1)/(4\alpha) + 1, & (2 - 3\alpha)/(2 - \alpha) < r \leq 1. \end{cases}$$

For each  $k \in \mathbb{N}$ , define the following density function  $\psi^{(k)}$ :

$$\psi^{(k)}(c) = \begin{cases} \frac{z_\epsilon + (1 - 1/k)(1 - z_\epsilon)}{z_\epsilon} \phi(c - \epsilon), & c \leq 0 \\ \frac{z_\epsilon + (1 - 1/k)(1 - z_\epsilon)}{z_\epsilon} \phi(-\epsilon) h\left(1 - c/\epsilon; \frac{(1 - z_\epsilon)z_\epsilon}{2k\epsilon(z_\epsilon + (1 - 1/k)(1 - z_\epsilon))\phi(-\epsilon)}\right), & 0 < c < \epsilon \\ \frac{z_\epsilon + (1 - 1/k)(1 - z_\epsilon)}{z_\epsilon} \phi(-\epsilon) h\left(c/\epsilon - 1; \frac{(1 - z_\epsilon)z_\epsilon}{2k\epsilon(z_\epsilon + (1 - 1/k)(1 - z_\epsilon))\phi(-\epsilon)}\right), & \epsilon \leq c < 2\epsilon \\ \frac{z_\epsilon + (1 - 1/k)(1 - z_\epsilon)}{z_\epsilon} \phi(\epsilon - c), & c \geq 2\epsilon. \end{cases}$$

By construction,  $\psi^{(k)}(c)$  is continuous and positive for all  $c \in \mathbb{R}$ , and integrates to 1. Let  $\mathbb{P}^{(k)}$  denote the corresponding probability distribution, and by construction we have  $\mathbb{P}^{(k)}[0 \leq c \leq 2\epsilon] = (1 - z_\epsilon)/k$ . Therefore  $\mathbb{P}^{(k)}[c > 0] - \mathbb{P}^{(k)}[c < 0] = (1 - z_\epsilon)/k \rightarrow 0$  as  $k \rightarrow \infty$ , but  $\mathbb{E}^{(k)}[c] = \epsilon$  since  $\psi^{(k)}(c - \epsilon) = \psi(\epsilon - c)$  is symmetric about  $\epsilon$ .  $\square$

*Proof of Proposition 2.* We know that

$$\delta_{\ell_{\text{SPO}^+}(\epsilon; \mathcal{P}_{\text{cont, sym, } \alpha})} = \inf_{w \in W} \inf_{\substack{\mathbb{P} \in \mathcal{P}_{\text{cont, sym, } \alpha} \\ |\mathbb{E}[c|w]| > \epsilon}} \{\mathbb{E}[c|w] (\mathbb{P}[c > 0|w] - \mathbb{P}[c < 0|w])\}.$$

Using the property of  $\mathcal{P}_{\text{cont, sym, } \alpha}$ , we deduce that

$$\delta_{\ell_{\text{SPO}^+}(\epsilon; \mathcal{P}_{\text{cont, sym, } \alpha})} \geq \inf_{w \in W} \inf_{\substack{\mathbb{P} \in \mathcal{P}_{\text{cont, sym, } \alpha} \\ |\mathbb{E}[c|w]| > \epsilon}} \alpha |\mathbb{E}[c|w]| \geq \alpha \epsilon.$$

Thus since  $\delta_{\ell_{\text{SPO}^+}(\epsilon; \mathcal{P}_{\text{cont, sym, } \alpha})} > 0$  for any  $\epsilon > 0$ , we have uniform calibration by Lemma 2. Furthermore, Theorem 3 gives us the risk bound.  $\square$

## EC.6. Proof of Results from Section 6

*Proof of Proposition 3.* Using Lagrange duality we know that the dual problem is

$$\min_{\gamma} \left\{ b\gamma + \frac{1}{2} (d - \gamma p)^\top Q^{-1} (d - \gamma p) \right\} = - \min_x \left\{ \frac{1}{2} x^\top Q x - d^\top x : p^\top x = b \right\},$$

and the optimal solution is  $x^*(d) = Q^{-1}(d - \gamma^*p)$  where  $\gamma^*$  is the optimal dual solution. The closed form solution is  $\gamma^* = \frac{1}{p^\top Q^{-1}p} (p^\top Q^{-1}d - b)$ , hence

$$x^*(d) = Q^{-1}d - \frac{1}{p^\top Q^{-1}p} (p^\top Q^{-1}d - b) Q^{-1}p = Ad + \frac{b}{p^\top Q^{-1}p} Q^{-1}p.$$

Observe that  $Ap = 0$ , so

$$\begin{aligned} x^*(d)^\top Q x^*(d) &= \left( Ad + \frac{b}{p^\top Q^{-1}p} Q^{-1}p \right)^\top \left( QAd + \frac{b}{p^\top Q^{-1}p} p \right) \\ &= d^\top A^\top QAd + \frac{b^2}{p^\top Q^{-1}p} \\ &= d^\top A^\top \left( I - \frac{p(Q^{-1}p)^\top}{p^\top Q^{-1}p} \right) d + \frac{b^2}{p^\top Q^{-1}p} \\ &= d^\top Ad + \frac{b^2}{p^\top Q^{-1}p} \\ c^\top x^*(d) &= c^\top Ad + \frac{b \cdot p^\top Q^{-1}c}{p^\top Q^{-1}p} \\ \frac{1}{2} x^*(d)^\top Q x^*(d) - c^\top x^*(d) &= \frac{1}{2} d^\top Ad - c^\top Ad + \frac{b^2/2 - b \cdot p^\top Q^{-1}c}{p^\top Q^{-1}p}. \end{aligned}$$

Clearly we have  $\frac{1}{2} x^*(c)^\top Q x^*(c) - c^\top x^*(c) = -\frac{1}{2} c^\top Ac + \frac{b^2/2 - b \cdot p^\top Q^{-1}c}{p^\top Q^{-1}p}$  so therefore

$$L(d, c) = \frac{1}{2} d^\top Ad - c^\top Ad + \frac{1}{2} c^\top Ac = \frac{1}{2} (d - c)^\top A (d - c).$$

The result now follows.  $\square$

*Proof of Proposition 4.* First, notice that  $\mathbb{E} \left[ \frac{1}{2} \|Vw - c\|_2^2 \right] = \frac{1}{2} \text{Tr}(V^\top V \mathbb{E}[ww^\top]) - \text{Tr}(V^\top \mathbb{E}[cw^\top]) + \frac{1}{2} \mathbb{E}[\|c\|_2^2]$ . Via standard vector calculus, we have  $\nabla_V \mathbb{E} \left[ \frac{1}{2} \|Vw - c\|_2^2 \right] = V \mathbb{E}[ww^\top] - \mathbb{E}[cw^\top]$ , therefore the optimality condition of the least squares predictor is

$$V \mathbb{E}[ww^\top] = \mathbb{E}[cw^\top].$$

Now observe that we can write  $\mathbb{E} \left[ \frac{1}{2} (Vw - c)^\top A (Vw - c) \right] = \frac{1}{2} \text{Tr}(V^\top A V \mathbb{E}[ww^\top]) - \text{Tr}(V^\top \mathbb{E}[Acw^\top]) + \frac{1}{2} \mathbb{E}[c^\top Ac]$ . The gradient is  $\nabla_V \mathbb{E} \left[ \frac{1}{2} (Vw - c)^\top A (Vw - c) \right] = A V \mathbb{E}[ww^\top] - A \mathbb{E}[cw^\top]$ . The optimality condition is  $A V \mathbb{E}[ww^\top] = A \mathbb{E}[cw^\top]$ . We can alternatively represent this as

$$V \mathbb{E}[ww^\top] \in \mathbb{E}[cw^\top] + \left\{ \tilde{V} : A \tilde{V} = \mathbf{0} \right\}.$$

Since  $\mathbb{E}[ww^\top]$  is invertible, the result follows.  $\square$

*Proof of Proposition 5* This result follows immediately from Lemma EC.6 below.  $\square$

LEMMA EC.6. Assume that  $\|d\|_1 \leq M$  and that  $M_\tau = M / (\min_{j \in [n]} p_j)$ . The set of optimal solutions to  $\max_{x \in X} \{d^\top x - \frac{\lambda}{2} \|x\|_2^2\}$  can be characterized as

$$\left\{ x : \begin{array}{l} p^\top x \leq B, \mathbf{0} \leq x \leq \mathbf{1} \\ \tau \geq 0, q, z \in \{0, 1\}^n, v \in \{0, 1\} \\ \tau \leq M_\tau v, B - p^\top x \leq B(1 - v) \\ d_j - p_j \tau \leq M q_j, p_j \tau - d_j \leq (M_\tau p_j + M)(1 - q_j), j \in [m] \\ d_j - p_j \tau - \lambda \leq M z_j, \lambda + p_j \tau - d_j \leq (M_\tau p_j + M + \lambda)(1 - z_j), j \in [m] \\ x_j \leq q_j, x_j \geq z_j, j \in [m] \\ \lambda x_j \leq d_j - p_j \tau + (M + M_\tau p_j)(1 - q_j), \lambda x_j \geq d_j - p_j \tau - M z_j, j \in [m]. \end{array} \right\}.$$

*Proof of Lemma EC.6.* Fix  $d$ . We consider the primal-dual pair of problems for the regularized fractional knapsack:

$$\begin{aligned} & \max_x \left\{ d^\top x - \frac{\lambda}{2} \|x\|_2^2 : p^\top x \leq B, \mathbf{0} \leq x \leq \mathbf{1} \right\} \\ & = \min_{s, y, \tau} \left\{ B\tau + \mathbf{1}^\top y + \frac{1}{2\lambda} \|s\|_2^2 : s \geq d - p\tau - y, s, y, \tau \geq 0 \right\}. \end{aligned}$$

Using the complementary slackness conditions, the set of primal-dual optimal pairs  $(x, s, y, \tau)$  can be written as

$$\begin{aligned} X^*(d) &= \left\{ (x, s, y, \tau) : \begin{array}{l} p^\top x \leq B, \mathbf{0} \leq x \leq \mathbf{1}, \\ s \geq d - p\tau - y, s, y, \tau \geq 0, \\ \tau(B - p^\top x) = 0, \\ y_i(1 - x_i) = 0, i \in [n] \\ x_i(s_i - (d_i - p_i\tau - y_i)) = 0, i \in [n] \\ s = \lambda x \end{array} \right\} \\ \text{Proj}_{x, \tau}(X^*(d)) &= \left\{ (x, \tau) : \begin{array}{l} p^\top x \leq B, \mathbf{0} \leq x \leq \mathbf{1}, \\ \tau \geq 0, \\ \tau(B - p^\top x) = 0, \\ \lambda x_i = \max\{0, \min\{\lambda, d_i - p_i\tau\}\}, i \in [n] \end{array} \right\}. \end{aligned}$$

To see why the second equality holds, consider some solution  $(x, s, y, \tau) \in X^*(d)$ . If  $d_i - p_i\tau - y_i > 0$ , then we need  $\lambda x_i = s_i = d_i - p_i\tau - y_i$ , which follows from  $s_i \geq d_i - p_i\tau - y_i$ ,  $x_i(s_i - (d_i - p_i\tau - y_i)) = 0$  and  $s_i = \lambda x_i$ . If  $d_i - p_i\tau - y_i \leq 0$ , then since  $s_i = \lambda x_i$ , we would have  $x_i(s_i - (d_i - p_i\tau - y_i)) > 0$  if  $s_i = \lambda x_i > 0$ , so we must have  $s_i = \lambda x_i = 0$ . Therefore  $\lambda x_i = \max\{0, d_i - p_i\tau - y_i\}$ . We now show that  $y_i = \max\{0, d_i - p_i\tau - \lambda\}$ . To see this, suppose that  $d_i - p_i\tau - \lambda > 0$ . We know that  $y_i \geq d_i - p_i\tau -$

$\lambda x_i > 0$ , and since  $y_i(1 - x_i) = 0$ , we have  $x_i = 1$ . Since  $\lambda x_i = \lambda = \max\{0, d_i - p_i\tau - y_i\} = d_i - p_i\tau - y_i$  implies that  $y_i = d_i - p_i\tau - \lambda$ . Now suppose that  $d_i - p_i\tau - \lambda \leq 0$ . If  $y_i > 0$ , then since  $y_i(1 - x_i) = 0$ , we necessarily have  $x_i = 1$ . But then  $\lambda x_i = \lambda \leq d_i - p_i\tau - y_i$  is a contradiction. Therefore we necessarily have  $y_i = 0$ . Substituting  $y_i = \max\{0, d_i - p_i\tau - \lambda\}$  into  $\lambda x_i = \max\{0, d_i - p_i\tau - y_i\}$  gives us  $\lambda x_i = \max\{0, \min\{\lambda, d_i - p_i\tau\}\}$ .

We assume that  $\|d\|_1 \leq M$ , and that we are given an a priori bound  $\tau \leq M_\tau$ . We can model the constraint  $\tau(B - p^\top x) = 0$  as

$$\tau \leq M_\tau v, \quad B - p^\top x \leq B(1 - v), \quad v \in \{0, 1\}.$$

We now describe how to model the constraint  $\lambda x_i = \max\{0, \min\{\lambda, d_i - p_i\tau\}\}$ . First, since  $\lambda > 0$ , we have that  $\min\{\lambda, d_i - p_i\tau\} \geq 0$  if and only if  $d_i - p_i\tau \geq 0$ . Let  $q_i$  be an indicator variable for this event, which we model as

$$d_i - p_i\tau \leq Mq_i, \quad p_i\tau - d_i \leq (M_\tau p_i + M)(1 - q_i).$$

Let  $z_i$  be an indicator variable for the event  $d_i - p_i\tau \geq \lambda$ , so we need the constraints

$$d_i - p_i\tau - \lambda \leq Mz_i, \quad \lambda + p_i\tau - d_i \leq (M_\tau p_i + M + \lambda)(1 - z_i).$$

Note that implicitly, we have  $q_i \geq z_i$ . When  $q_i = 0$ , we have  $\lambda x_i = 0$ . When  $q_i = 1$  and  $z_i = 1$ , we have  $x_i = 1$ , and when  $q_i = 1$  and  $z_i = 0$ , we have  $\lambda x_i = d_i - p_i\tau$ . Therefore we need the constraints

$$x_i \leq q_i, \quad x_i \geq z_i, \quad \lambda x_i \leq d_i - p_i\tau + (M + M_\tau p_i)(1 - q_i), \quad \lambda x_i \geq d_i - p_i\tau - Mz_i.$$

This shows that the proposed MIP representation is correct.  $\square$

*Proof of Proposition 6.* The dual of  $\min_{x \in X} \left( 2d_j x_j + \sum_{j' \in [m], j' \neq j} (2d_{j'} - 1)x_{j'} \right)$  is  $\max_\gamma \{\gamma : \gamma \leq 2d_j, \gamma \leq 2d_{j'} - 1, j' \in [m] \setminus \{j\}\}$ . The lifted representation immediately follows from this.  $\square$
